# Supplementary material
Source: bioRxiv or medRxiv preprint supplement (https://www.medrxiv.org/highwire/filestream/71294/field_highwire_adjunct_files/0/2020.01.17.20017798-1.pdf)
Supplement: Supplementary file [file 2020.01.17.20017798-1.pdf]

| <b>Variable</b>                           | <b>Comments</b>                   | <b>Unit</b>       |
|-------------------------------------------|-----------------------------------|-------------------|
| <i>Age</i>                                | -                                 | years             |
| <i>Waist circumference</i>                | -                                 | cm                |
| <i>Body mass index (BMI)</i>              | -                                 | kg/m <sup>2</sup> |
| <i>Height</i>                             | -                                 | cm                |
| <i>Weight</i>                             | -                                 | kg                |
| <i>Years since hypertension diagnosis</i> | Until ambulatory measurements     | years             |
| <i>Office heart rate</i>                  | Average of 2 consecutive readings | bpm               |
| <i>Office SBP</i>                         | Average of 2 consecutive readings | mmHg              |
| <i>Office DBP</i>                         | Average of 2 consecutive readings | mmHg              |
| <i>24-hour ambulatory heart rate</i>      | Average over 24 hours             | bpm               |
| <i>Daytime heart rate</i>                 | Average over 24 hours             | bpm               |
| <i>Nighttime heart rate</i>               | Average over 24 hours             | bpm               |
| <i>24-hour ambulatory SBP</i>             | Average over 24 hours             | mmHg              |
| <i>24-hour ambulatory DBP</i>             | Average over 24 hours             | mmHg              |
| <i>Daytime ambulatory SBP</i>             | Average of daytime                | mmHg              |
| <i>Daytime ambulatory DBP</i>             | Average of daytime                | mmHg              |
| <i>Nighttime ambulatory SBP</i>           | Average of nighttime              | mmHg              |
| <i>Nighttime ambulatory DBP</i>           | Average of nighttime              | mmHg              |
| <i>Sex</i>                                | (Men/Women)                       | -                 |
| <i>Diabetic</i>                           | (Yes/No)                          | -                 |
| <i>Smoker</i>                             | (Yes/No)                          | -                 |
| <i>Cardiovascular disease</i>             | Antecedents (Yes/No)              | -                 |
| <i>Renal damage</i>                       | Antecedents (Yes/No)              | -                 |
| <i>Ischemic heart disease</i>             | Antecedents (Yes/No)              | -                 |
| <i>Dyslipidemia</i>                       | Antecedents (Yes/No)              | -                 |
| <i>Left ventricular hypertrophy</i>       | Antecedents (Yes/No)              | -                 |
| <i>Heart failure</i>                      | Antecedents (Yes/No)              | -                 |
| <i>Stroke</i>                             | Antecedents (Yes/No)              | -                 |
| <i>Chronic kidney disease</i>             | Antecedents (Yes/No)              | -                 |
| <i>Target organ damage</i>                | Antecedents (Yes/No)              | -                 |
| <i>Atheroma plaque</i>                    | Antecedents (Yes/No)              | -                 |
| <i>Number of medications</i>              | Antihypertensive                  | n                 |
| <i>Total cholesterol</i>                  | -                                 | mg/dL             |
| <i>Triglycerides</i>                      | -                                 | mg/dL             |
| <i>Glucose</i>                            | -                                 | mg/dL             |
| <i>LDL cholesterol</i>                    | -                                 | mg/dl             |
| <i>HDL cholesterol</i>                    | -                                 | mg/dL             |
| <i>Diuretic</i>                           | Treatment (Yes/No)                | -                 |
| <i>Calcium-channel blocker</i>            | Treatment (Yes/No)                | -                 |
| <i>ACE inhibitor</i>                      | Treatment (Yes/No)                | -                 |
| <i>Beta blocker</i>                       | Treatment (Yes/No)                | -                 |

|                                         |                                                      |       |
|-----------------------------------------|------------------------------------------------------|-------|
| <i>Alpha blocker</i>                    | Treatment (Yes/No)                                   | -     |
| <i>Angiotensin receptor blocker</i>     | Treatment (Yes/No)                                   | -     |
| <i>Statins</i>                          | Treatment (Yes/No)                                   | -     |
| <i>Other antihypertensives</i>          | Treatment (Yes/No)                                   | -     |
| <i>Number of CV risk factors*</i>       | -                                                    | n     |
| <i>Groups of cardiovascular risk*</i>   | (Basal, Low, Moderate, High, Very High)              | -     |
| <i>Binary cardiovascular risk*</i>      | (Moderate vs. High)                                  | -     |
| <i>Antihypertensive treatment*</i>      | (Yes/No)                                             | -     |
| <i>Circadian profile*</i>               | (Dipper, Extreme Dipper, Non-Dipper, Reverse-Dipper) | -     |
| <i>Antihypertensive treatment type*</i> | (No, Mono, Multi) Therapy                            | -     |
| <i>Obesity based BMI*</i>               | IMC above 30 (Yes/No)                                | -     |
| <i>Albumin-creatinine ratio*</i>        | -                                                    | -     |
| <i>Creatinine*</i>                      | -                                                    | mg/dL |
| <i>BMI Grouping*</i>                    | (<20, 20-25, 25-30, >30)                             | -     |
| <i>High Office BP*</i>                  | >140/90 mmHg (Yes/No)                                | -     |

BMI – Body Mass Index; BP – Blood Pressure; SBP – Systolic BP; DBP – Diastolic BP; ACE - Angiotensin-converting-enzyme; CV – Cardiovascular; LDL - Low-density lipoprotein; HDL - High-density lipoprotein.

\*These variables were not considered for feature selection
